# Supplementary material for: Broadband ultraviolet plasmonic enhanced AlGaN/GaN heterojunction photodetectors with close-packed Al nanoparticle arrays
Source: Royal Society of Chemistry journal article supplement (doi:10.1039/d3cp02060f), 2023-01-01
Supplement: d3cp02060f1.pdf [file d3cp02060f1.pdf]

## Supporting Information

### Broadband Ultraviolet Plasmonic Enhanced AlGaN/GaN Heterojunction Photodetectors with Close-packed Al Nanoparticle Array

Leilei Xu,<sup>a</sup> Xiaotian Ge,<sup>a</sup> Zengli Huang\*<sup>a</sup>, Tong Liu,<sup>a</sup> Rongxin Wang,<sup>a</sup> Hongwei

Gao,<sup>b,c</sup> Yu Zhou,<sup>b,c</sup> Miao Wang,<sup>b,c</sup> Jianfeng Wang<sup>b,c</sup> and Ke Xu\*<sup>b,c</sup>

<sup>a</sup> Vacuum Interconnected Nanotech Workstation (Nano-X) , Suzhou Institute of Nano-Tech and Nano-Bionics  
Chinese Academy of Sciences Suzhou 215123, China

<sup>b</sup>CAS Key Laboratory of Nanophotonic Materials and Devices, Suzhou Institute of Nano-Tech and Nano-Bionics,  
Suzhou 215123, China

<sup>c</sup>Suzhou Institute of Nano-Tech and Nano-Bionics (SINANO), Chinese Academy of Sciences, Suzhou 215123, China

#### Corresponding Author

Email: \*[zhuang2008@sinano.ac.cn](mailto:zhuang2008@sinano.ac.cn) \*[kxu2006@sinano.ac.cn](mailto:kxu2006@sinano.ac.cn)

**Keywords:** aluminum, plasmonic, array, photodetector, heterojunction, ultraviolet, AlGaIn,

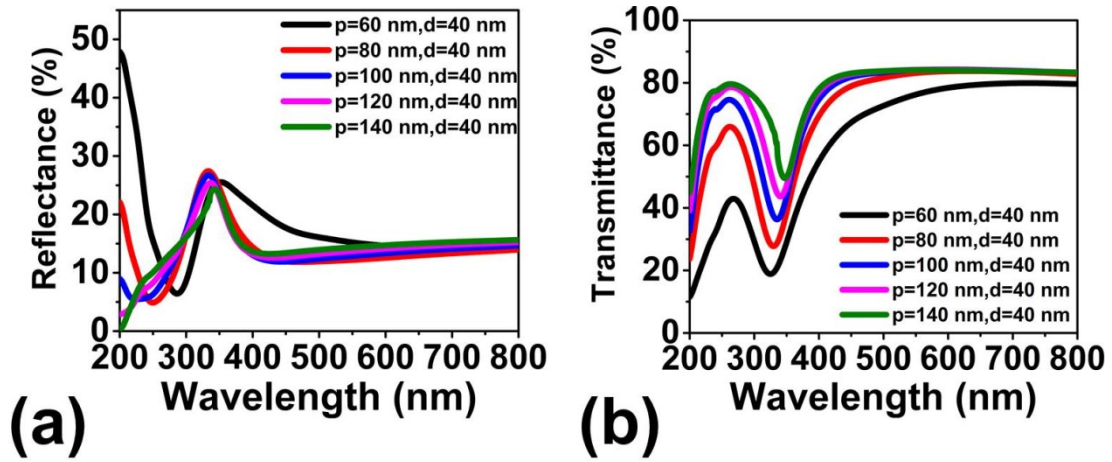

Figure S1. Simulated reflectance (a) and transmittance (b) spectra of the Al NPs array on AlGaIn/GaN substrate as a function of array period for the particle size of  $d=40$  nm.

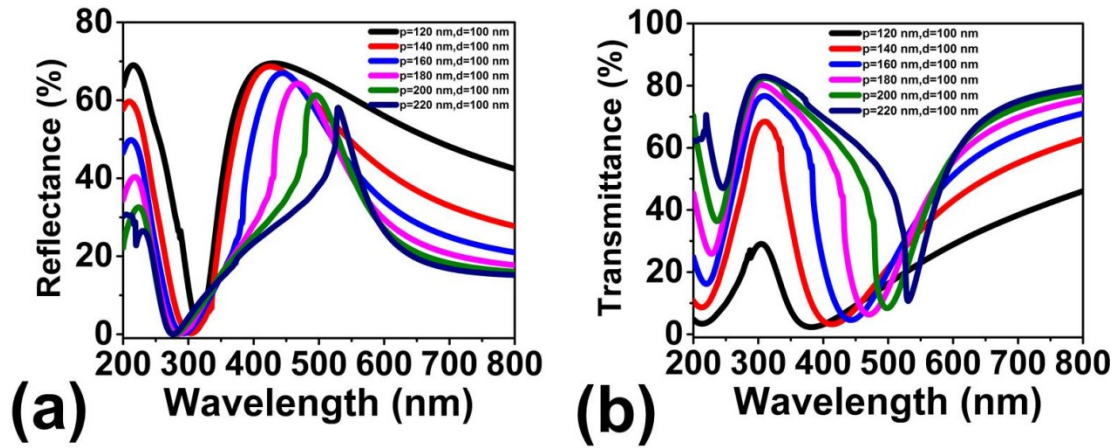

Figure S2. Simulated reflectance (a) and transmittance (b) spectra of the Al NPs array on AlGaIn/GaN substrate as a function of array period for the particle size of  $d=100$  nm.

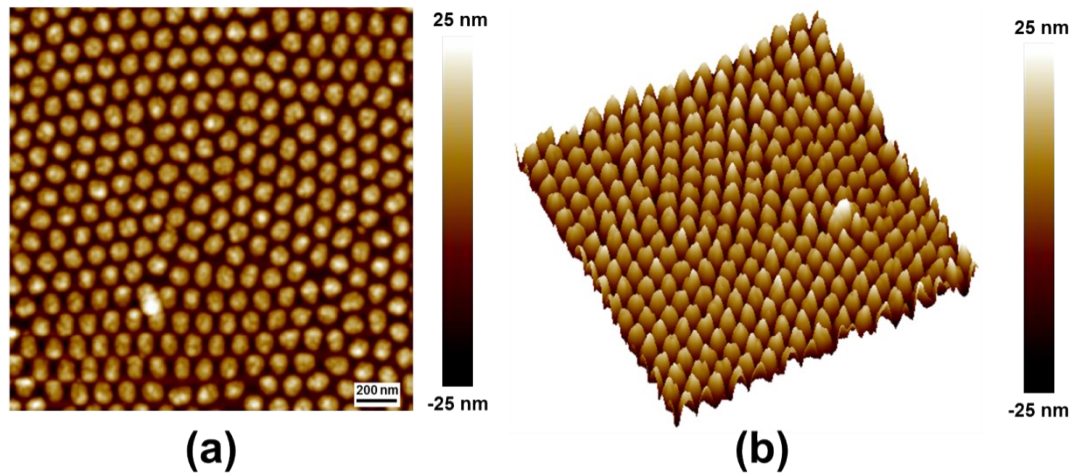

Figure S3. AFM images of the Al NPs array ( $p=120$  nm and  $d=100$  nm) on AlGaIn/GaN substrate. (a) Planar view and (b) 3D view of the Al NPs array.

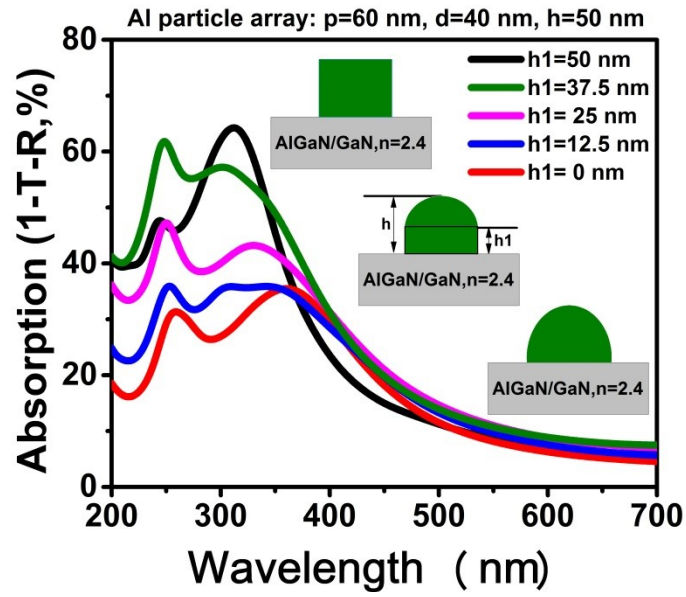

**Figure S4.** Simulated absorption spectra of the Al NPs array on AlGaIn/GaN substrate with different heights of cylinder for the cylinder-ellipsoid composite Al nanoparticle.

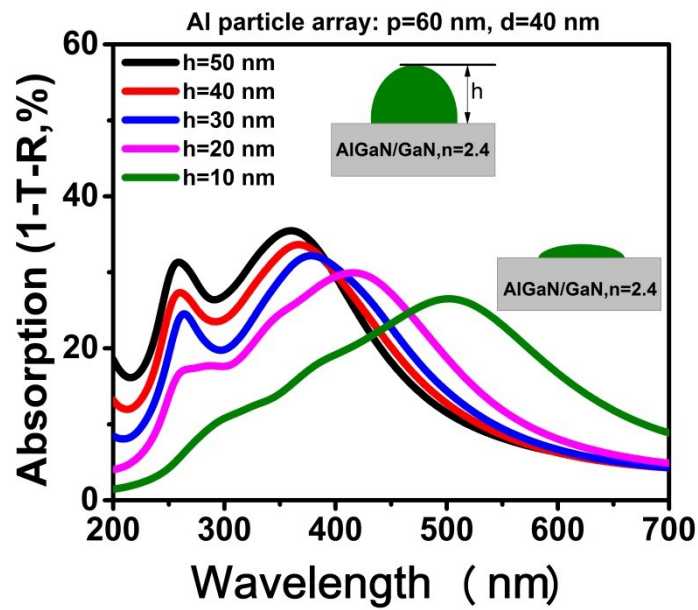

**Figure S5** Simulated absorption spectra of the Al NPs array on AlGaIn/GaN substrate with different heights of Al ellipsoid particle.

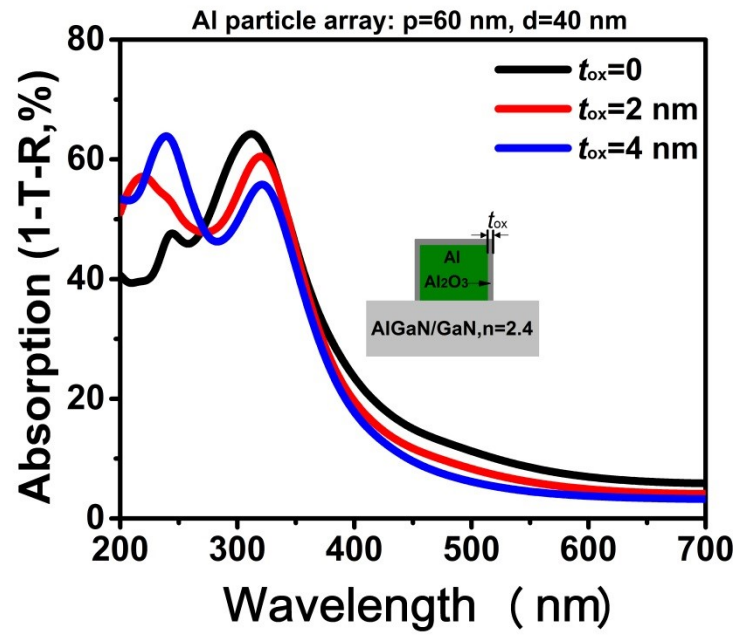

**Figure S6** Simulated absorption spectra of the Al NPs array on AlGaIn/GaN substrate with different surface oxide thicknesses  $t_{ox}$ .
